# Supplementary material for: Development and External Validation of Partial Proportional Odds Risk Prediction Models for Cancer Stage at Diagnosis among Males and Females in Canada
Source: Cancers (Basel). 2023 Jul 8;15(14):3545. doi: 10.3390/cancers15143545 (PMC10377619; doi:10.3390/cancers15143545)
Supplement: Supplementary file 1 [file cancers-15-03545-s001.zip › cancers-2414503-supplementary.pdf]

**Supplemental materials: Biziaev et al. Development and external validation of partial proportional odds risk prediction models for cancer stage at diagnosis among males and females in Canada**

**Supplemental Table S1.** Variable definitions and revised response coding used from Alberta's Tomorrow Project and British Columbia Generations Project cohorts

| Variable                                   | ATP (n= 2112)                   |                                                                                                                       | BCGP (n = 855)                   |                                                                                                                                                                        | Coding                               |
|--------------------------------------------|---------------------------------|-----------------------------------------------------------------------------------------------------------------------|----------------------------------|------------------------------------------------------------------------------------------------------------------------------------------------------------------------|--------------------------------------|
|                                            | Data Source                     | Response Options                                                                                                      | Data Source                      | Response Options                                                                                                                                                       |                                      |
| Cancer stage                               | ACR administrative data linkage |                                                                                                                       | BCCR administrative data linkage |                                                                                                                                                                        | I/II/III/IV                          |
| Age at cancer diagnosis (years and months) | ACR administrative data linkage |                                                                                                                       | BCCR administrative data linkage |                                                                                                                                                                        | Real number value in the analysis    |
| Employment                                 | HLQ                             | 7 options                                                                                                             | HLCQ                             | 8 options                                                                                                                                                              | Collapsed to full or part-time/other |
| Family history of heart attack             | HLQ                             | Respondent chooses from a list of diagnoses per immediate family member                                               | HLCQ                             | Respondent chooses from a list of diagnoses per immediate family member                                                                                                | Yes/no                               |
| Have ever had mammogram test               | HLQ                             | Q: Have you ever had a mammogram test (a breast x-ray)?                                                               | HLCQ                             | Q: When was the last time you had a mammogram?<br><br>7 options, including never                                                                                       | Yes/no                               |
| Have ever had PSA test                     | HLQ                             | Q: Have you ever had a PSA blood test? (This is a specific test ordered by a doctor to test men for prostate cancer.) | HLCQ                             | Q: When was the last time you had a PSA blood test? A PSA test is a specific blood test ordered by a doctor to test men for prostate cancer. 7 options including never | Yes/no                               |
| Have ever had sigmoidoscopy/ colonoscopy   | HLQ                             |                                                                                                                       | HLCQ                             | Q: When was the last time you had a colonoscopy?<br><br>Q: When was the last time you had a sigmoidoscopy?                                                             | Yes/no                               |
| Number of pregnancies                      | HLQ                             | Q: How many times have you been pregnant?                                                                             | HLCQ                             | Q: How many times have you been pregnant, including live births, stillbirths,                                                                                          | Integer                              |

|                            |                     |                                                                                         |      |                                                                                         |                                                      |
|----------------------------|---------------------|-----------------------------------------------------------------------------------------|------|-----------------------------------------------------------------------------------------|------------------------------------------------------|
|                            |                     |                                                                                         |      | spontaneous miscarriages, or therapeutic abortions?                                     |                                                      |
| Have ever had hysterectomy | HLQ                 | Q: Did you ever have a hysterectomy? (An operation to have your uterus or womb removed) | HLCQ | Q: Have you ever had a hysterectomy (an operation to have your uterus or womb removed)? | Yes/no                                               |
| Type of smoker             | HLQ, Derived by ATP | Multiple (>20) questions                                                                | HLCQ | Multiple (18) questions                                                                 | Collapsed to current smoker/past smoker/never smoker |

ACR, Alberta Cancer Registry; ATP, Alberta's Tomorrow Project; BCCR, British Columbia Cancer Registry; BCGP, British Columbia Generations Project; HLQ, Health and Lifestyle Questionnaire; HLCQ, Health and Lifestyle Core Questionnaire

**Table S2.** Aggregated cancer sites for category “other cancers” by cohort

| Cancer sites other than breast, lung, prostate, and colorectal cancer over 5% |                                                   |                |                                              |                |
|-------------------------------------------------------------------------------|---------------------------------------------------|----------------|----------------------------------------------|----------------|
| ATP                                                                           |                                                   |                | BCGP                                         |                |
|                                                                               | Cancer Cases from the Alberta Cancer Registry (n) | Percentage (%) | Cancer Cases from the BC Cancer Registry (n) | Percentage (%) |
| Female Genital Organs                                                         | 168                                               | 24%            | 63                                           | 25%            |
| Digestive Organs                                                              | 153                                               | 22%            | 72                                           | 29%            |
| Hematopoietic & Reticuloendothelial Systems                                   | 107                                               | 16%            | 62                                           | 25%            |
| Urinary Tract                                                                 | 89                                                | 13%            | –                                            | –              |
| Melanoma                                                                      | 65                                                | 9%             | –                                            | –              |
| Thyroid & Other Endocrine Glands                                              | 42                                                | 6%             | –                                            | –              |
| Head & Neck                                                                   | 39                                                | 6%             | 18                                           | 7%             |
| Total                                                                         | 688                                               | 100%           | 252                                          | 100%           |

The percentages do not sum to 100%, due to that fact that only cancer sites other than breast, lung, prostate, and colorectal cancer having more than 5% among total cases of all the other cancer sites were included.

**Supplemental Table S3.** Participant characteristics of Alberta's Tomorrow Project and British Columbia Generations Project cohorts

| Characteristic                      | ATP Development          |                             | BCGP Validation          |                            |
|-------------------------------------|--------------------------|-----------------------------|--------------------------|----------------------------|
|                                     | Males (n = 903)<br>n (%) | Females (n = 1209)<br>n (%) | Males (n = 298)<br>n (%) | Females (n = 557)<br>n (%) |
| Cancer stage at diagnosis           |                          |                             |                          |                            |
| I                                   | 196 (21.7)               | 521 (43.1)                  | 70 (23.5)                | 266 (47.8)                 |
| II                                  | 369 (40.9)               | 311 (25.7)                  | 115 (38.6)               | 129 (23.2)                 |
| III                                 | 150 (16.6)               | 207 (17.1)                  | 59 (19.8)                | 96 (17.2)                  |
| IV                                  | 188 (20.8)               | 170 (14.1)                  | 54 (18.1)                | 66 (11.8)                  |
| Ethnicity†                          |                          |                             |                          |                            |
| Caucasian                           | 875 (96.9)               | 1176 (97.3)                 | 281 (94.3)               | 490 (88.0)                 |
| Non-Caucasian                       | 28 (3.1)                 | 33 (2.7)                    | 17 (5.7)                 | 67 (12.0)                  |
| Education†‡                         |                          |                             |                          |                            |
| High school diploma                 | 296 (32.8)               | 420 (34.7)                  | 63 (21.1)                | 144 (25.9)                 |
| Some university                     | 399 (44.2)               | 542 (44.8)                  | 96 (32.2)                | 225 (40.4)                 |
| University degree                   | 208 (23.0)               | 247 (20.4)                  | 139 (46.6)               | 188 (33.8)                 |
| Married or common in-law            |                          |                             |                          |                            |
| Yes                                 | 755 (83.6)               | 879 (72.7)                  | 246 (82.6)               | 389 (69.8)                 |
| No                                  | 148 (16.4)               | 330 (27.3)                  | 52 (17.4)                | 168 (30.2)                 |
| Employment†‡                        |                          |                             |                          |                            |
| Full or part-time                   | 603 (66.8)               | 722 (59.7)                  | 125 (41.9)               | 290 (52.1)                 |
| Other                               | 300 (33.2)               | 487 (40.3)                  | 173 (58.1)               | 267 (47.9)                 |
| Annual household Income (\$)†‡      |                          |                             |                          |                            |
| < 50K                               | 289 (32.0)               | 534 (44.2)                  | 86 (28.9)                | 196 (35.2)                 |
| 50 - 100K                           | 404 (44.7)               | 488 (40.4)                  | 120 (40.3)               | 216 (38.8)                 |
| > 100K                              | 210 (23.3)               | 187 (15.5)                  | 92 (30.9)                | 145 (26.0)                 |
| Family history of diabetes‡         |                          |                             |                          |                            |
| Yes                                 | 241 (26.7)               | 349 (28.9)                  | 73 (24.5)                | 194 (34.8)                 |
| No                                  | 662 (73.3)               | 860 (71.1)                  | 225 (75.5)               | 363 (65.2)                 |
| Family history of heart attack      |                          |                             |                          |                            |
| Yes                                 | 310 (34.3)               | 477 (39.5)                  | 121 (40.6)               | 218 (39.1)                 |
| No                                  | 593 (65.7)               | 732 (60.5)                  | 177 (59.4)               | 339 (60.9)                 |
| Family history of stroke†‡          |                          |                             |                          |                            |
| Yes                                 | 189 (20.9)               | 306 (25.3)                  | 85 (28.5)                | 175 (31.4)                 |
| No                                  | 714 (79.1)               | 903 (74.7)                  | 213 (71.5)               | 382 (68.6)                 |
| Family history of breast cancer‡    |                          |                             |                          |                            |
| Yes                                 | 119 (13.2)               | 179 (14.8)                  | 37 (12.4)                | 107 (19.2)                 |
| No                                  | 784 (86.8)               | 1030 (85.2)                 | 261 (87.6)               | 450 (80.8)                 |
| Family history of colorectal cancer |                          |                             |                          |                            |
| Yes                                 | 94 (10.4)                | 120 (9.9)                   | 41 (13.8)                | 63 (11.3)                  |

|                                              |            |             |            |            |
|----------------------------------------------|------------|-------------|------------|------------|
| No                                           | 809 (89.6) | 1089 (90.1) | 257 (86.2) | 494 (88.7) |
| Family history of prostate cancer            |            |             |            |            |
| Yes                                          | 101 (11.2) | 95 (7.9)    | 50 (16.8)  | 56 (10.1)  |
| No                                           | 702 (77.7) | 1114 (92.1) | 248 (83.2) | 501 (89.9) |
| Family history of lung cancer†‡              |            |             |            |            |
| Yes                                          | 82 (9.1)   | 120 (9.9)   | 54 (18.1)  | 82 (14.7)  |
| No                                           | 821 (90.9) | 1089 (90.1) | 244 (81.9) | 475 (85.3) |
| Family history of all cancer†‡               |            |             |            |            |
| Yes                                          | 515 (57)   | 703 (58.1)  | 208 (69.8) | 390 (70.0) |
| No                                           | 388 (43)   | 506 (41.9)  | 90 (30.2)  | 167 (30.0) |
| Family history of other†‡                    |            |             |            |            |
| Yes                                          | 311 (34.4) | 460 (38.0)  | 59 (19.8)  | 131 (23.5) |
| No                                           | 592 (65.6) | 749 (62.0)  | 239 (80.2) | 426 (76.5) |
| Have ever had blood stool test†‡             |            |             |            |            |
| Yes                                          | 337 (37.3) | 456 (37.7)  | 207 (69.5) | 330 (59.2) |
| No                                           | 566 (62.7) | 753 (62.3)  | 91 (30.5)  | 227 (40.8) |
| Have ever had sigmoidoscopy or colonoscopy†‡ |            |             |            |            |
| Yes                                          | 212 (23.4) | 322 (26.6)  | 149 (50.0) | 252 (45.2) |
| No                                           | 691 (76.5) | 887 (73.4)  | 149 (50.0) | 305 (54.8) |
| Have ever had PSA blood test†                |            |             |            |            |
| Yes                                          | 389 (43.1) | -           | 254 (85.2) | -          |
| No                                           | 514 (56.9) | -           | 44 (14.8)  | -          |
| Have ever had mammogram‡                     |            |             |            |            |
| Yes                                          | -          | 1033 (85.4) | -          | 521 (93.5) |
| No                                           | -          | 176 (14.6)  | -          | 36 (6.5)   |
| Have ever had pap smear test‡                |            |             |            |            |
| Yes                                          | -          | 1141 (94.4) | -          | 540 (96.9) |
| No                                           | -          | 68 (5.6)    | -          | 17 (3.1)   |
| Have ever had oophorectomy‡                  |            |             |            |            |
| Yes                                          | -          | 102 (8.4)   | -          | 69 (12.4)  |
| No                                           | -          | 1107 (91.6) | -          | 476 (85.5) |
| Missing                                      | -          |             | -          | 12 (0.2)   |
| Have ever had hysterectomy                   |            |             |            |            |
| Yes                                          | -          | 298 (24.6)  | -          | 126 (22.6) |
| No                                           | -          | 911 (75.4)  | -          | 431 (77.4) |
| Have ever been pregnant‡                     |            |             |            |            |
| Yes                                          | -          | 1091 (90.2) | -          | 451 (81.0) |

|                                                          |                |                |                |                |
|----------------------------------------------------------|----------------|----------------|----------------|----------------|
| No                                                       | -              | 118 (9.8)      | -              | 106 (19.0)     |
| Have ever had hormone replacement therapy for menopause  |                |                |                |                |
| Yes                                                      | -              | 490 (40.5)     | -              | 239 (42.9)     |
| No                                                       | -              | 719 (59.5)     | -              | 318 (57.1)     |
| Smoking status <sup>†‡</sup>                             |                |                |                |                |
| Non-smoker                                               | 291 (32.2)     | 474 (39.2)     | 139 (46.6)     | 280 (50.3)     |
| Past smoker                                              | 417 (46.2)     | 444 (36.7)     | 142 (47.7)     | 244 (43.8)     |
| Current smoker                                           | 195 (21.6)     | 290 (24.0)     | 17 (5.7)       | 33 (5.9)       |
| Self-perceived health <sup>†‡</sup>                      |                |                |                |                |
| Excellent/very good                                      | 367 (40.6)     | 555 (45.9)     | 182 (61.1)     | 373 (67.0)     |
| Good/fair                                                | 425 (47.1)     | 505 (41.8)     | 110 (36.9)     | 177 (31.8)     |
| Poor                                                     | 111 (12.2)     | 149 (12.3)     | 2 (0.7)        | 4 (0.7)        |
|                                                          | Median (Q1-Q3) | Median (Q1-Q3) | Median (Q1-Q3) | Median (Q1-Q3) |
| Age at enrollment (years) <sup>†‡</sup>                  | 57 (50-63)     | 55 (47-62)     | 64 (60-67)     | 60 (53-65)     |
| Age at diagnosis (years) <sup>†‡</sup>                   | 65 (58-70)     | 63 (55-69)     | 67 (63-70)     | 64 (56-68)     |
| Age at first menstruation (years)                        |                | 13 (12-13)     |                | 13 (12-14)     |
| Missing                                                  |                |                |                | 21             |
| Alcohol consumption (servings/week) <sup>†‡</sup>        | 5.0 (1.1-9.3)  | 1.0 (0.2-3.4)  | 0.0 (0.0-6.0)  | 0.0 (0.0-4.0)  |
| Fruit and vegetable intake (servings/week) <sup>†‡</sup> | 4.1 (2.6-5.5)  | 4.4 (2.9-6.0)  | 5.0 (3.0-7.0)  | 5.0 (4.0-7.0)  |
| Comorbidity (0-7) <sup>†</sup>                           | 0 (0-1)        | 1 (0-1)        | 1 (0-1)        | 1 (0-2)        |
| Number of pregnancies <sup>‡</sup>                       | -              | 3 (2-4)        | -              | 2 (1-3)        |

<sup>†</sup>Statistically significant difference for males between datasets  $p < 0.05$ ; <sup>‡</sup> Statistically significant difference for females between datasets  $p < 0.05$ ; Comorbidity index: range (0-7), Q1 = first quartile, Q3 = third quartile
